# Supplementary material for: On-line coupling of gel electrophoresis (GE) and inductively coupled plasma-mass spectrometry (ICP-MS) for the detection of Fe in metalloproteins
Source: Royal Society of Chemistry journal article supplement (doi:10.1039/b704541g), 2007-01-01
Supplement: b704541g.pdf [file b704541g.pdf]

ESI:

**Table 1.** Instrumental parameters for the ICP-MS System.

| ICP System         |                                                     |
|--------------------|-----------------------------------------------------|
| Instrument         | Element2                                            |
| Forward power      | 800 W                                               |
| Auxiliary gas flow | 1 L·min <sup>-1</sup>                               |
| Coolant gas flow   | 15 L·min <sup>-1</sup>                              |
| Nebuliser gas flow | 1.05 L·min <sup>-1</sup>                            |
| Sampler cone       | Ni, 1 mm orifice                                    |
| Skimmer cone       | Ni, 0.7 mm orifice                                  |
| Dwell time/isotope | 0.8 s                                               |
| Isotopes monitored | <sup>56</sup> Fe, <sup>79</sup> Br, <sup>32</sup> S |
